# Supplementary material
Source: PubMed Central journal article supplement (PMC3266950)

Supplemental Figures.

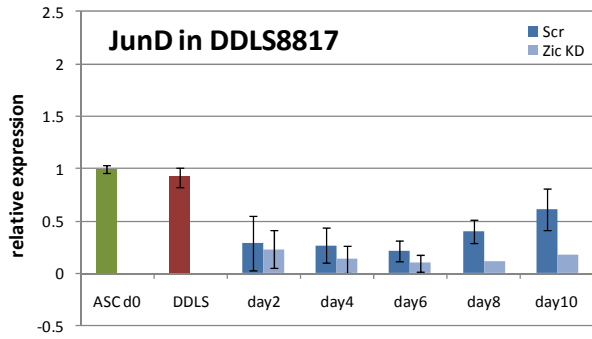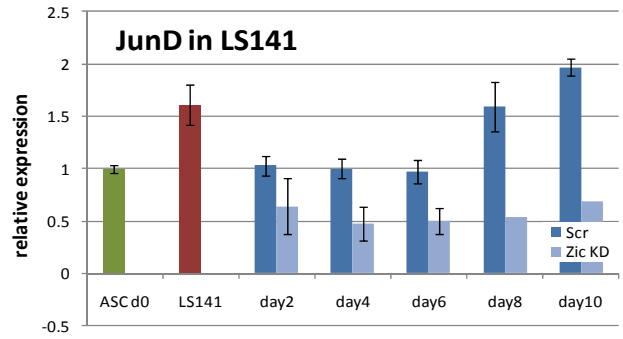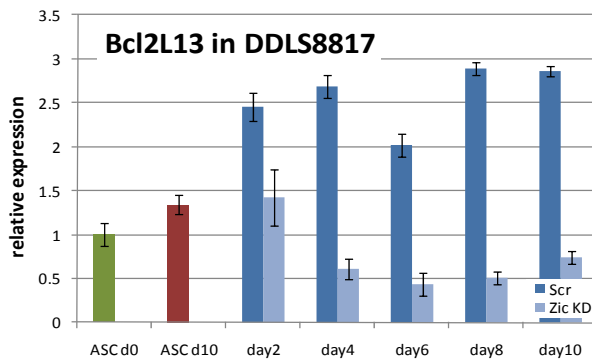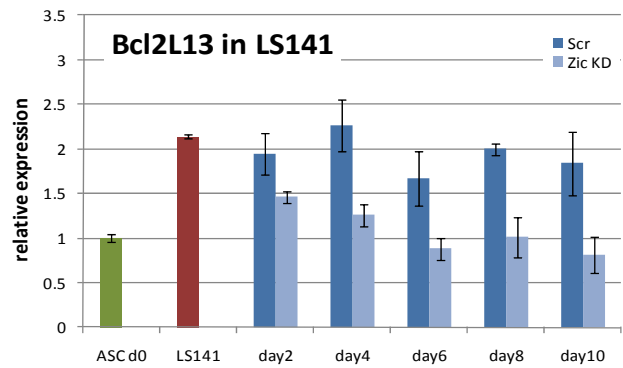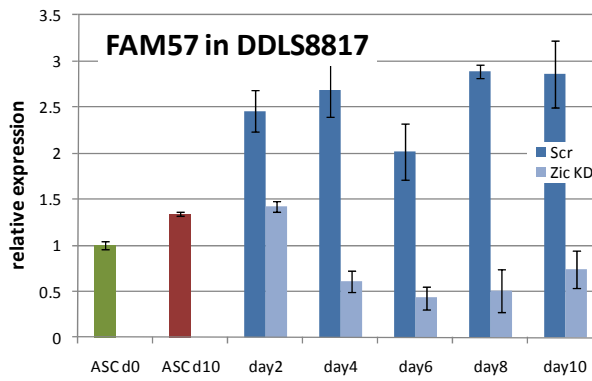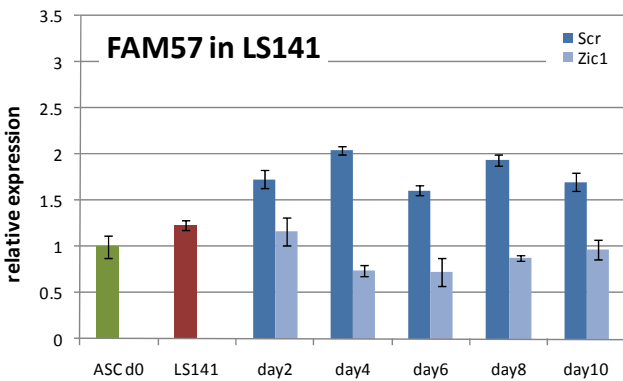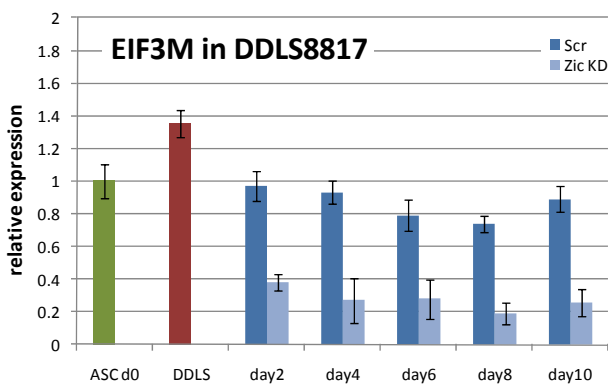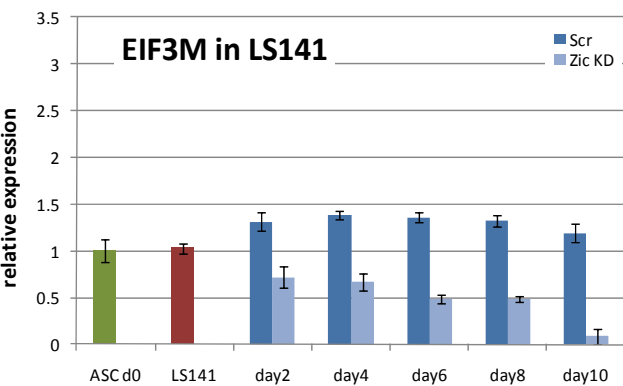

Supplement: NIHMS346109-supplement-Supplemental_Figure_1.pdf [file NIHMS346109-supplement-Supplemental_Figure_1.pdf]

Supplemental Figure 2.

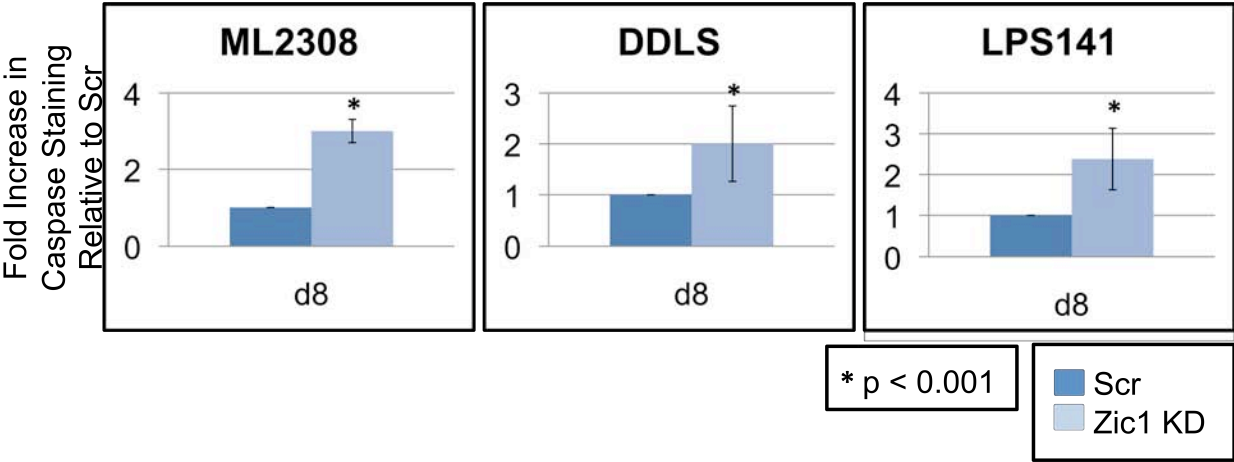

Supplement: NIHMS346109-supplement-Supplemental_Figure_2.pdf [file NIHMS346109-supplement-Supplemental_Figure_2.pdf]
